# Supplementary material for: The Role of Surface Treatment and Coupling Agents for Adhesion between Stainless Steel (SUS) and Polyamide (PA) of Heterojunction Bilayer Composites
Source: MDPI journal article supplement (doi:10.3390/polym16070896), 2024-03-25
Supplement: s1 [file s1]

## **Supplementary information**

# **Role of Surface Treatment and Coupling Agent for Adhesion between Stainless Steel (SUS) and Polyamide (PA) of Heterojunction Bilayer Composites**

*Hayeong Lee<sup>1</sup>, Seung-In Song<sup>1</sup>, and Keon-Soo Jang\**

*Department of Polymer Engineering, School of Chemical and Materials Engineering, The  
University of Suwon, Hwaseong, Gyeonggi-do, 18323, Republic of Korea*

<sup>1</sup>: These authors (H. Lee and S. Song) contributed equally: Co-1<sup>st</sup> authors

**CORRESPONDING AUTHOR FOOTNOTE** \*To whom correspondence should be  
addressed. K.-S. Jang: [ksjang@suwon.ac.kr](mailto:ksjang@suwon.ac.kr)

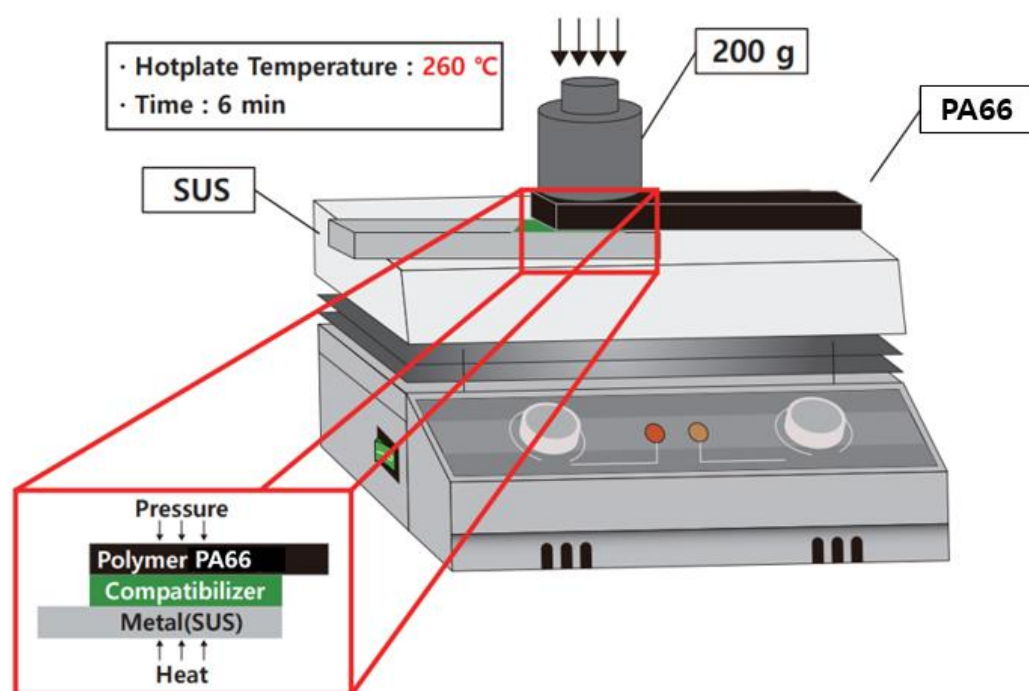

Figure S1. Fabrication of heterojunction bilayer composites for lap shear strength tests.

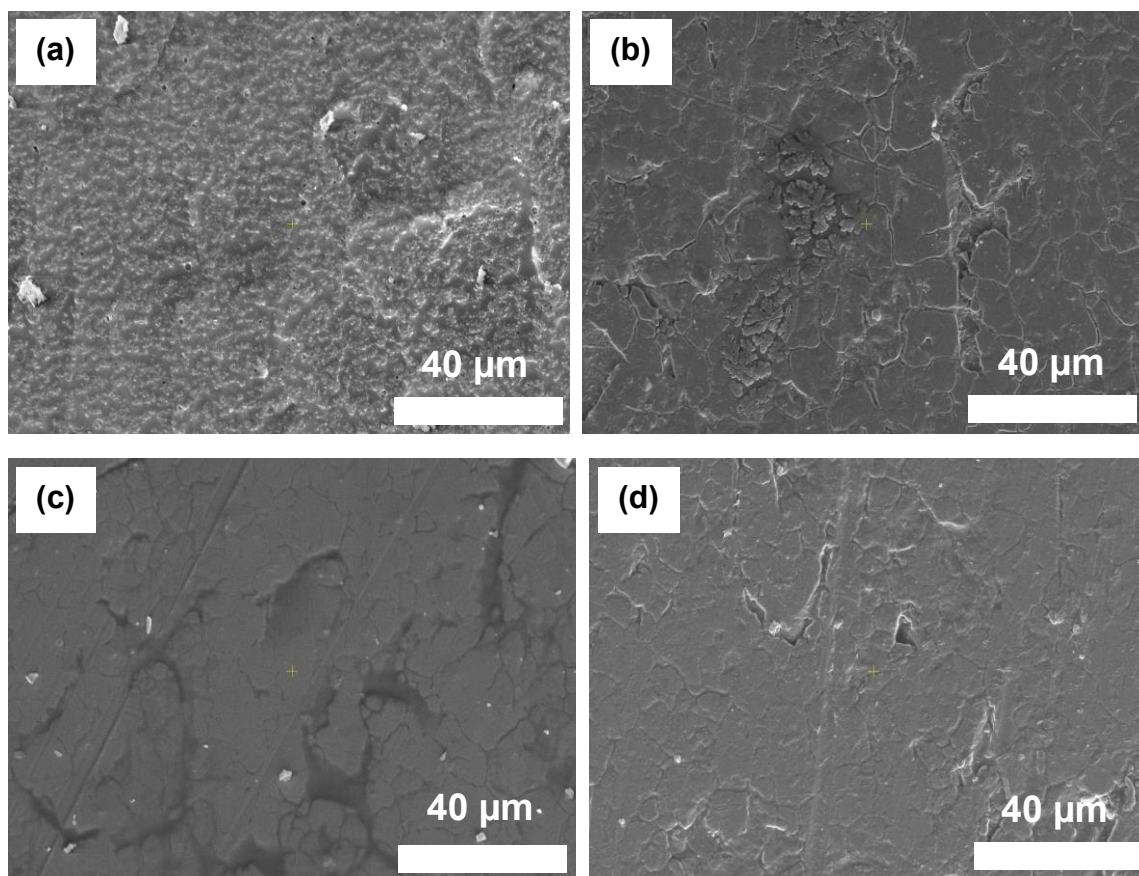

Figure S2. SEM images of untreated SUS surfaces with different silane coupling agents ( $\times 2,500$ ): (a) A1S, (b) ES, (c) A2S, and (d) VS.

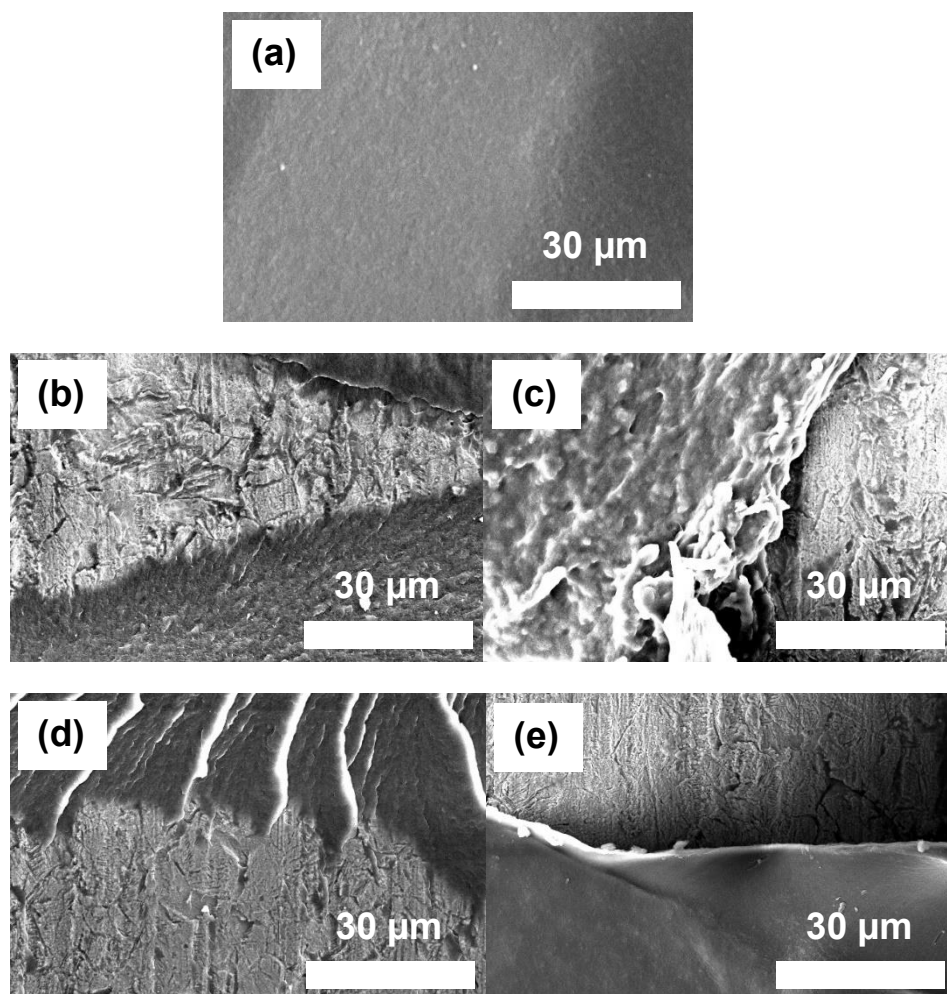

**Figure S3.** SEM images of fracture-surface SUS with different silane coupling agents ( $\times 2,500$ ) after lap shear tests: (a) C+E+F-treated SUS without coupling agent, (b–e) C+E+F-treated SUS with coupling agent: (b) with A1S, (c) ES, (d) VS, and (e) A2S.

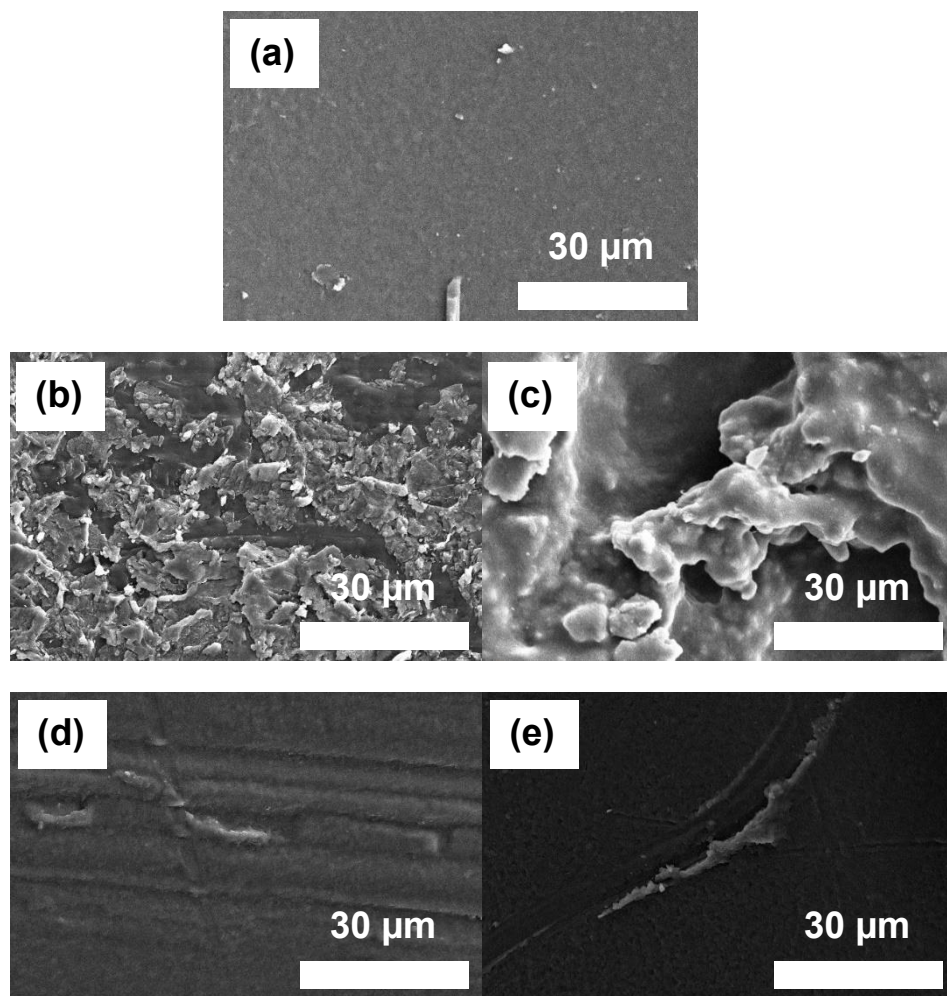

**Figure S4.** SEM images of fractured PA66 surfaces with different silane coupling agents ( $\times 2,500$ ) after lap shear tests: (a) C+E+F-treated SUS without coupling agent, (b–e) C+E+F-treated SUS with coupling agent: (b) with A1S, (c) ES, (d) VS, and (e) A2S.



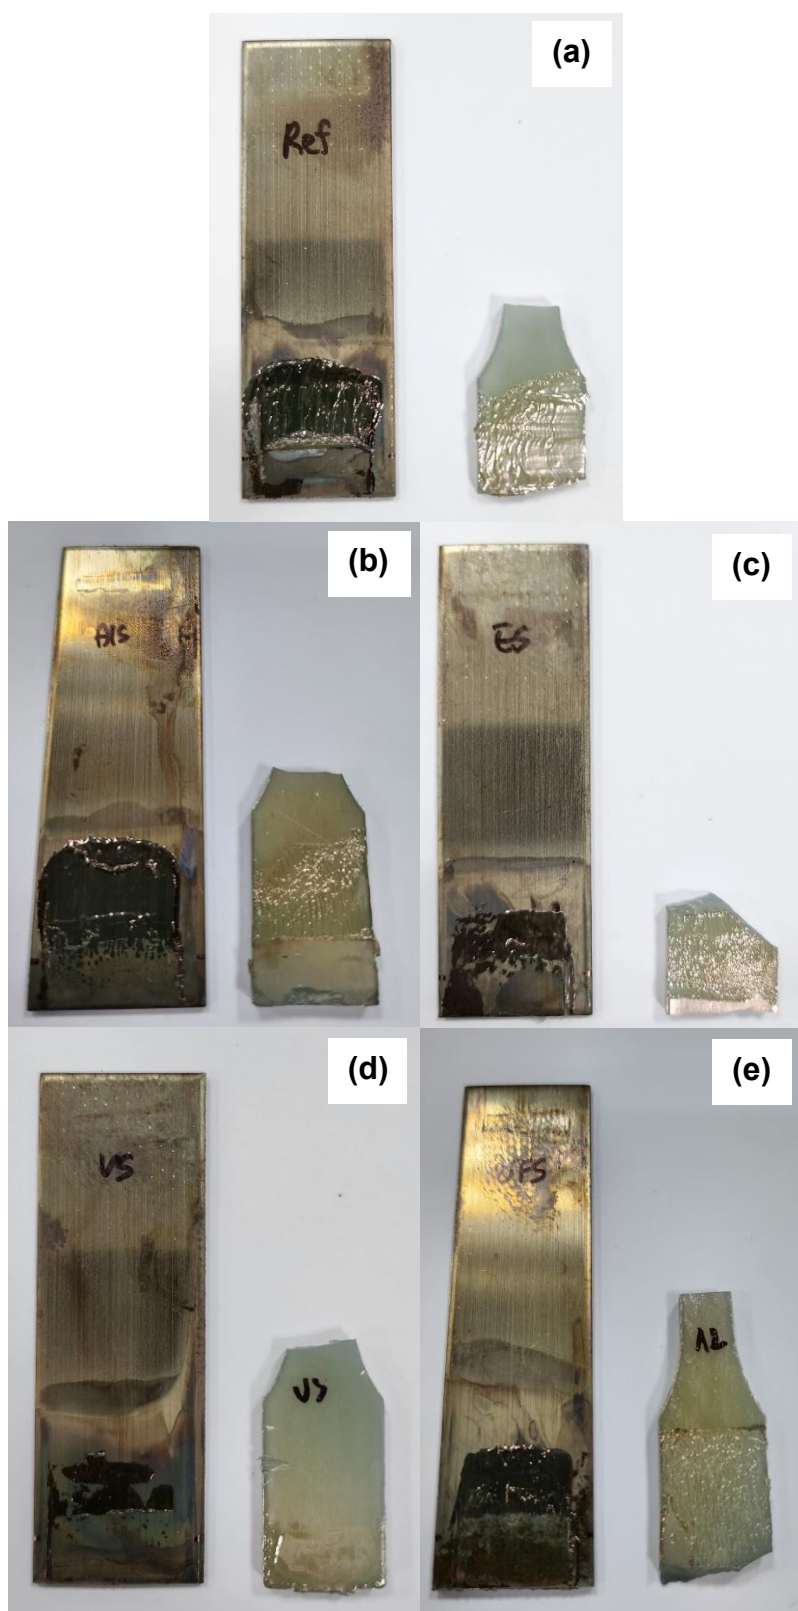

**Figure S5.** SEM images of fractured SUS and PA66 surfaces with different silane coupling agents: (a) C+E+F-treated SUS without coupling agent, (b–e) C+E+F-treated SUS with coupling agent: (b) with A1S, (c) ES, (d) VS, and (e) A2S. Left and right images indicate SUS and PA66, respectively, after lap shear tests.
